# Supplementary material for: Synergetic activation of “silent receptor” sites leading to a new type of inclusion complex: integration of a 64-membered ring comprising K+and SO42−ions into a molybdenum oxide-based nanoobject
Source: Royal Society of Chemistry journal article supplement (doi:10.1039/b305447k), 2003-01-01
Supplement: b305447k.doc [file b305447k.doc]

**Synergetic activation of “silent receptor” sites leading to a new type of inclusion complex: integration of a 64-membered ring comprising K+ and SO42- ions into a molybdenum oxide-based nanoobject**

Achim Müller,* Liviu Toma, Hartmut Bögge, Marc Schmidtmann and Paul Kögerler

**Experimental details**

To a solution of Na2MoO4  2 H2O (3 g, 12.4 mmol) in water (10ml) which is acidified with 0.5M H2SO4 (35 ml), Na2S2O4 (0.15 g, 0.86 mmol) as reducing agent is added under stirring (immediate colour change to blue). After *ca.* 5 minutes K2C2O4 (0.5 g) is added (to increase the pH and electrolyte concentration; CH3COOK can be used instead) and the solution is stirred in a closed flask at about 70 ºC for 1 hour. After 5-7 days the solution is filtered and the precipitated blue crystals (mainly tetragonal prisms) are washed with cold water (50ml) (yield: 200 mg, 10% referring to molybdenum; correct analysis).

**Crystal data**

Crystals of **1** were removed from the mother liquor and immediately cooled to 183(2) K on a Bruker AXS SMART diffractometer (three circle goniometer with 1K CCD detector, Mo-Kα radiation, graphite monochromator; hemisphere data collection in *ω* at 0.3° scan width in three runs with 606, 435 and 230 frames (*φ*= 0, 88 and 180°) at a detector distance of 6.50 cm). A total of 159990 reflections (1.11 < *Θ* < 20.04°) were collected of which 27280 reflections were unique (*R*(int) = 0.1144). An empirical absorption correction using equivalent reflections was performed with the program SADABS. The structure was solved with the program SHELXS-97 and refined using SHELXL-93 to *R* = 0.0843 for 16975 reflections with *I*>2*σ*(*I*), *R* = 0.1427 for all reflections; max./min. residual electron density 1.599 and -0.995 e Å-3. (SHELXS/L, SADABS from G.M. Sheldrick, University of Göttingen, 1993/97; structure graphics with DIAMOND 2.1 from K. Brandenburg, Crystal Impact GbR, 2001.) Although the 16 K+ positions integrated in the ring could be easily detected by the X-ray structure analysis, the number of lattice cations which are as usual disordered, had (mostly) to be determined analytically. This means that according to their relatively low abundance (*ca.* 1%), a small error limit has to be taken into account for the relative amount of Na and K.

Further details of the crystal structure determination may be obtained from the Fachinformationszentrum Karlsruhe, 76344 Eggenstein-Leopoldshafen, Germany (fax: (+49)7247-808-666; e-mail: crysdata@fiz-karlsruhe.de) on quoting the depository no. CSD 412534.

Defects in the {Mo1} and {Mo2} groups known from previous cases are generally observed (like in the case of the Keggin ions at relatively higher pH values 3): see A. Müller, R. Maiti, M. Schmidtmann, H. Bögge, S. K. Das and W. Zhang, *Chem. Commun*, 2001, 2126-2127. In case of the positions where a {Mo2} group is missing the {Mo6O6} “receptors” are not complete, but this has no influence on the overall structure, and especially not on the K+ positions and the related ring formation due to the K+-SO42- interactions. The deep knowledge of molybdenum oxide-based systems allows to discover modifications of sphere and wheel type nanoobjects (see ref 2). Important also: the parent compounds can be obtained in facile high-yield syntheses, see A. Müller, S. K. Das, E. Krickemeyer and C. Kuhlmann, *Inorg. Synth*. 2004, **34**, in press (ed. J. Shapley).

EHMO calculations of the cluster anions **1a** and **2a** have been performed using the YAeHMOP package (G. A. Landrum and W. V. Glassey, *bind 3.0*, http://sourceforge.net/projects/yaehmop) and parameters implemented there. Proton positions of the OH and OH2 groups were modeled to supplement the single-crystal X-ray analysis coordinates.
